# Supplementary material for: Discovery of Anti-inflammatory Ingredients in Chinese Herbal Formula Kouyanqing Granule based on Relevance Analysis between Chemical Characters and Biological Effects
Source: PubMed Central journal article supplement (PMC4674803; doi:10.1038/srep18080), 2015-12-10
Supplement: srep18080-s1.pdf [file srep18080-s1.pdf]

**Manuscript ID: SREP-15-18150A**

**Title: Discovery of Anti-inflammatory Ingredients in Chinese Herbal Formula Kouyanqing Granule based on Relevance Analysis between Chemical Characters and Biological Effects**

**Authors:** Hong Liu<sup>1,†</sup>, Yan-fang Zheng<sup>1,†</sup>, Chu-yuan Li<sup>2</sup>, Yu-ying Zheng<sup>1</sup>, De-qin Wang<sup>2</sup>, Zhong Wu<sup>1</sup>, Lin Huang<sup>2</sup>, Yong-gang Wang<sup>1</sup>, Pei-bo Li<sup>1</sup>, Wei Peng<sup>1</sup>, Wei-wei Su<sup>1,\*</sup>

**† Two authors contributed equally to this work.**

<sup>1</sup> Guangzhou Quality R&D Center of Traditional Chinese Medicine, Guangdong Key Laboratory of Plant Resources, School of Life Sciences, Sun Yat-sen University, Guangzhou, P.R. China

<sup>2</sup> Hutchison Whampoa Guangzhou Baiyunshan Chinese Medicine Co., Ltd., Guangzhou, P.R. China

**Running title:** Bioactive Ingredients for Anti-inflammatory Effects of Kouyanqing Granule

**Correspondence:** \*Wei-wei Su, Guangzhou Quality R&D Center of Traditional Chinese Medicine, Guangdong Key Laboratory of Plant Resources, School of Life Sciences, Sun Yat-sen University, 135 Xingangxi Road, Guangzhou 510275, PR China. Tel: +86 20 84110808, Fax: +86 20 84112398, E-mail: [lssww@126.com](mailto:lssww@126.com)

### **Supplementary Information-Video Legends**

**KYQG ingredient-effect relevance bubble chart S1:** a dynamic bubble chart based on the computed results (Table 6) to illustrate a clear picture of the anti-inflammatory effects of the 38 identified ingredients in KYQG. Y-axis: Partial least-squares regression coefficient; X-axis: Grey relational degree; Span: Effect parameters (IL-1 $\beta$ , IL-6, IL-8, TNF- $\alpha$ ); Bubble ID: 38 Identified ingredients; Bubble Color: 38 Identified ingredients.

**KYQG herb-effect relevance bubble chart S2:** a dynamic bubble chart based on the computed results (Table 6) to illustrate a clear picture of the anti-inflammatory effects of the 5 herbs in KYQG. Y-axis: Partial least-squares regression coefficient; X-axis: Grey relational degree; Span: Effect parameters (IL-1 $\beta$ , IL-6, IL-8, TNF- $\alpha$ ); Bubble ID: 38 Identified ingredients; Bubble Color: 5 herbs.
